# Supplementary material for: Exploring the Causal Effects of Mineral Metabolism Disorders on Telomere and Mitochondrial DNA: A Bidirectional Two-Sample Mendelian Randomization Analysis
Source: MDPI journal article supplement (doi:10.3390/nu16101417), 2024-05-08
Supplement: s1 [file s1]

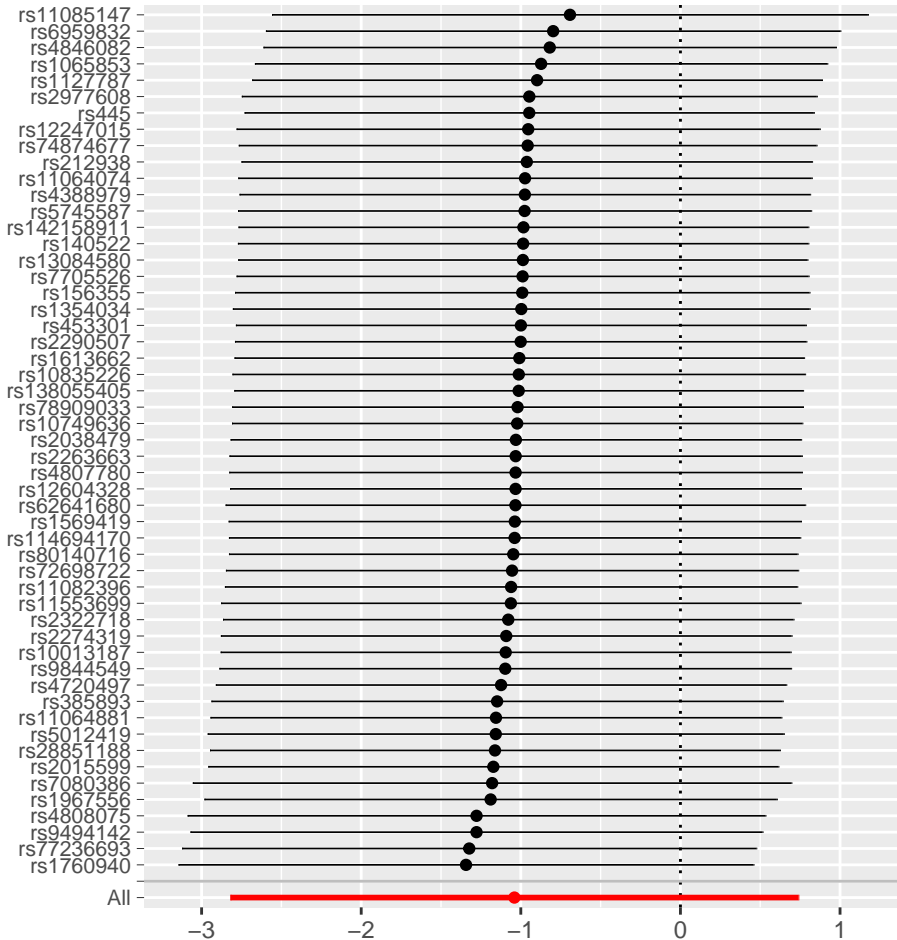

MR leave-one-out sensitivity analysis for  
'Mitochondrial DNA copy number || id:ebi-a-GCST90026372' on 'outcome'
