# Supplementary material for: Exploring the Causal Effects of Mineral Metabolism Disorders on Telomere and Mitochondrial DNA: A Bidirectional Two-Sample Mendelian Randomization Analysis
Source: MDPI journal article supplement (doi:10.3390/nu16101417), 2024-05-08
Supplement: s1 [file s1]

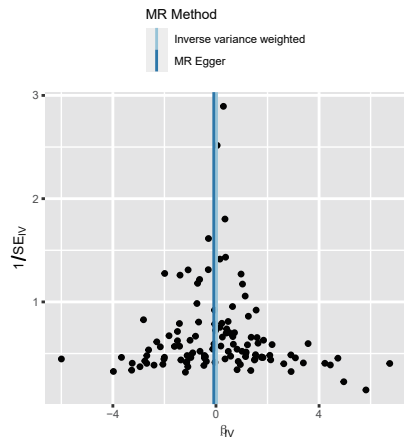

TL to MINERAL MET

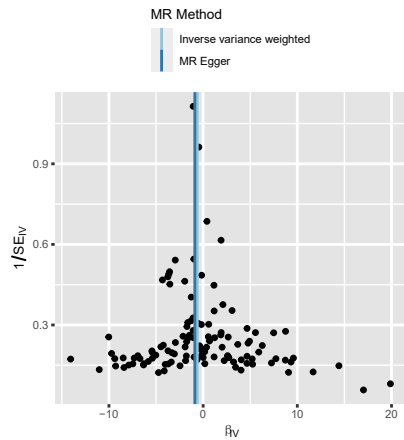

TL to IRON MET

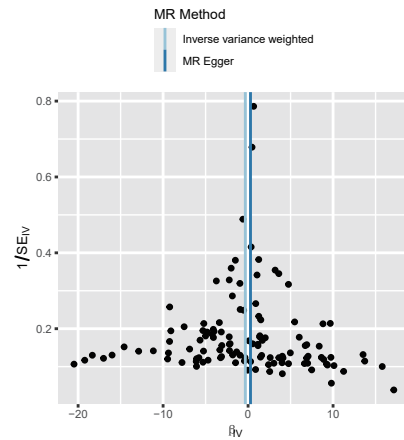

TL to MG MET

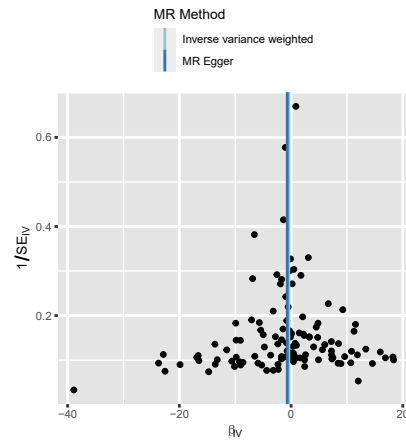

TL to PHOS MET

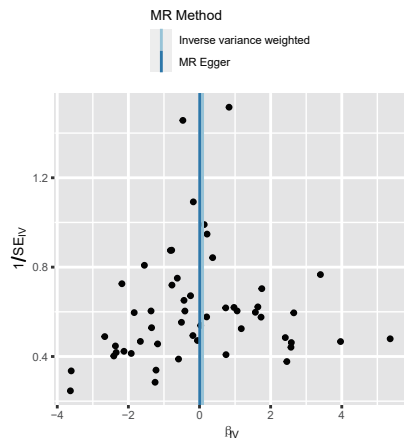

mtDNA-CN to MINERAL MET

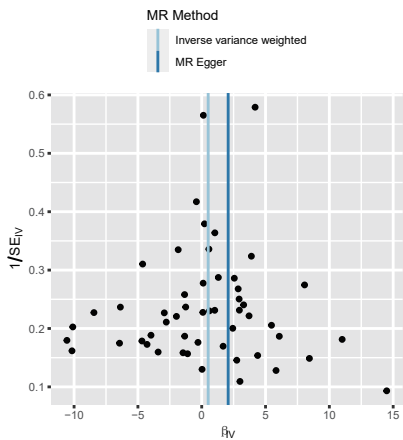

mtDNA-CN to IRON MET

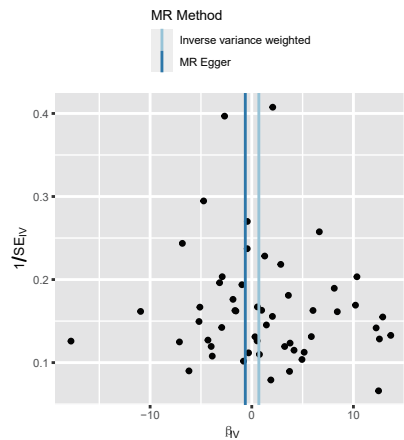

mtDNA-CN to MG MET

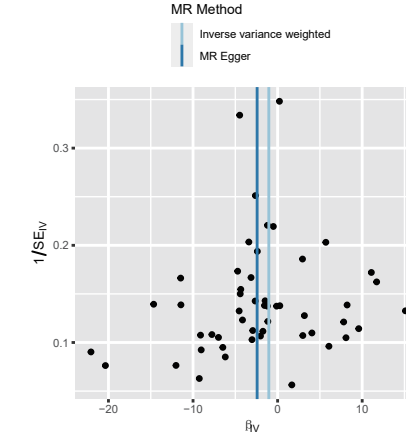

mtDNA-CN to PHOS MET
