# Supplementary figures and images for: Exploring the Causal Effects of Mineral Metabolism Disorders on Telomere and Mitochondrial DNA: A Bidirectional Two-Sample Mendelian Randomization Analysis
Source: MDPI journal article supplement (doi:10.3390/nu16101417), 2024-05-08

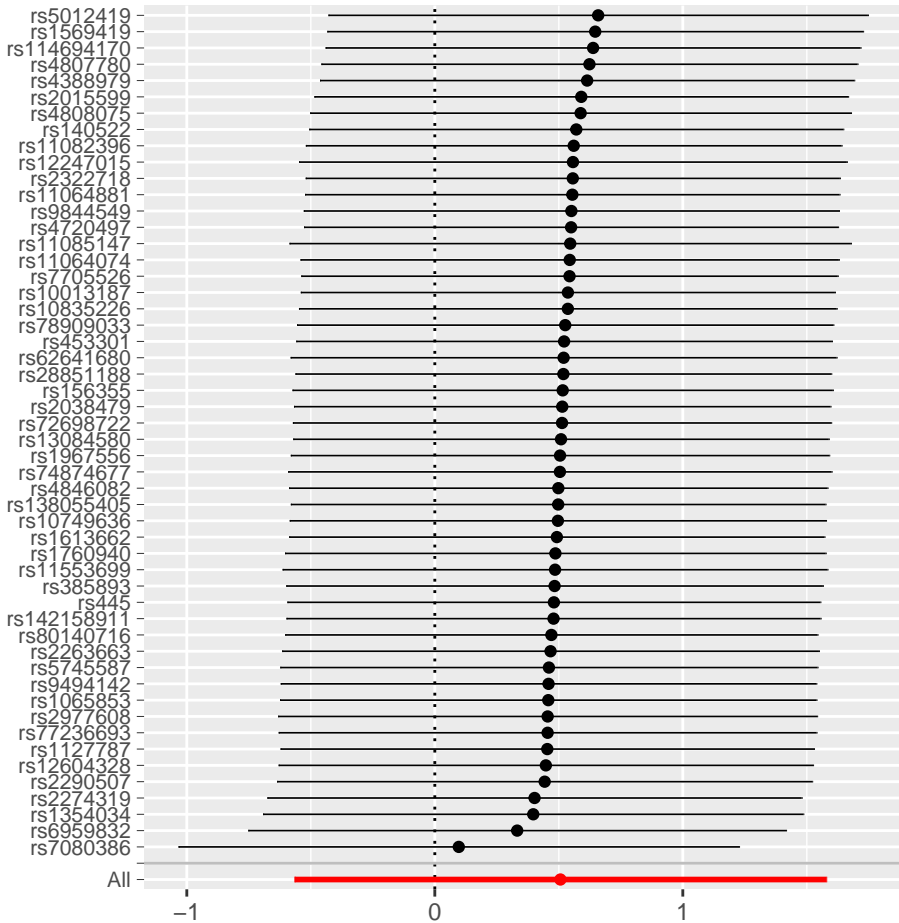

Supplement: s1 [file s1]

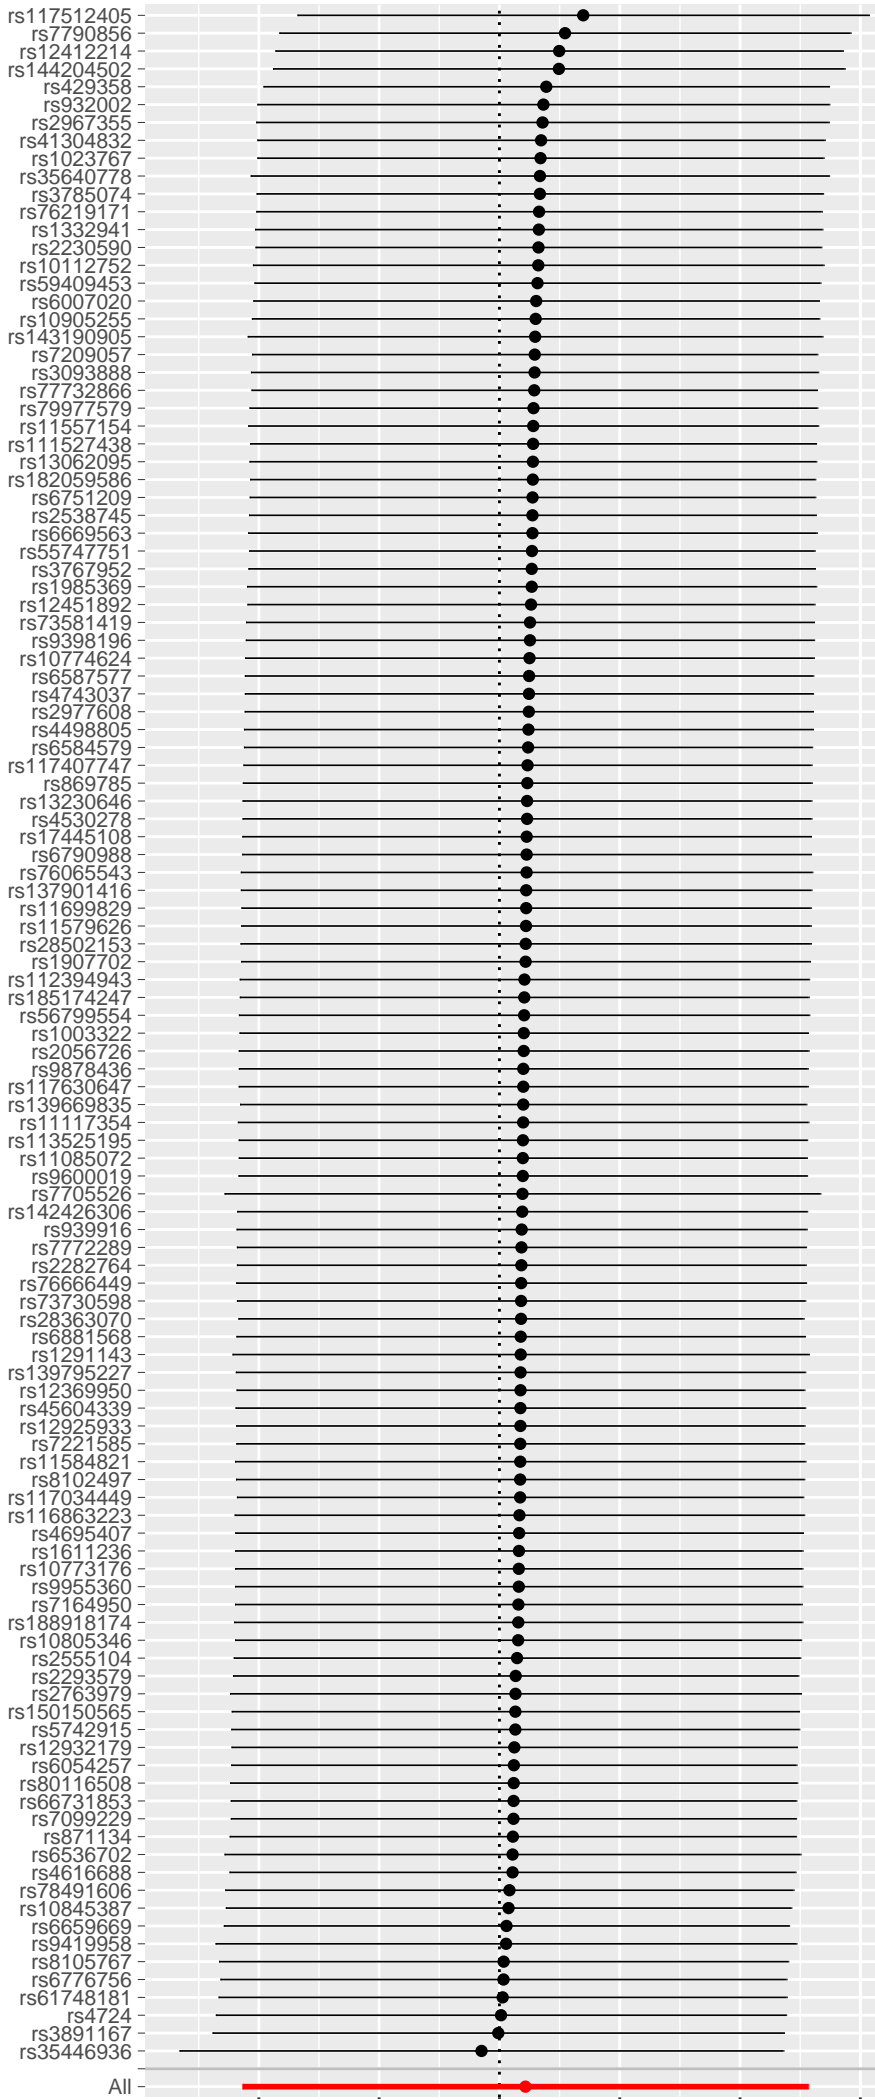

Supplement: s1 [file s1]

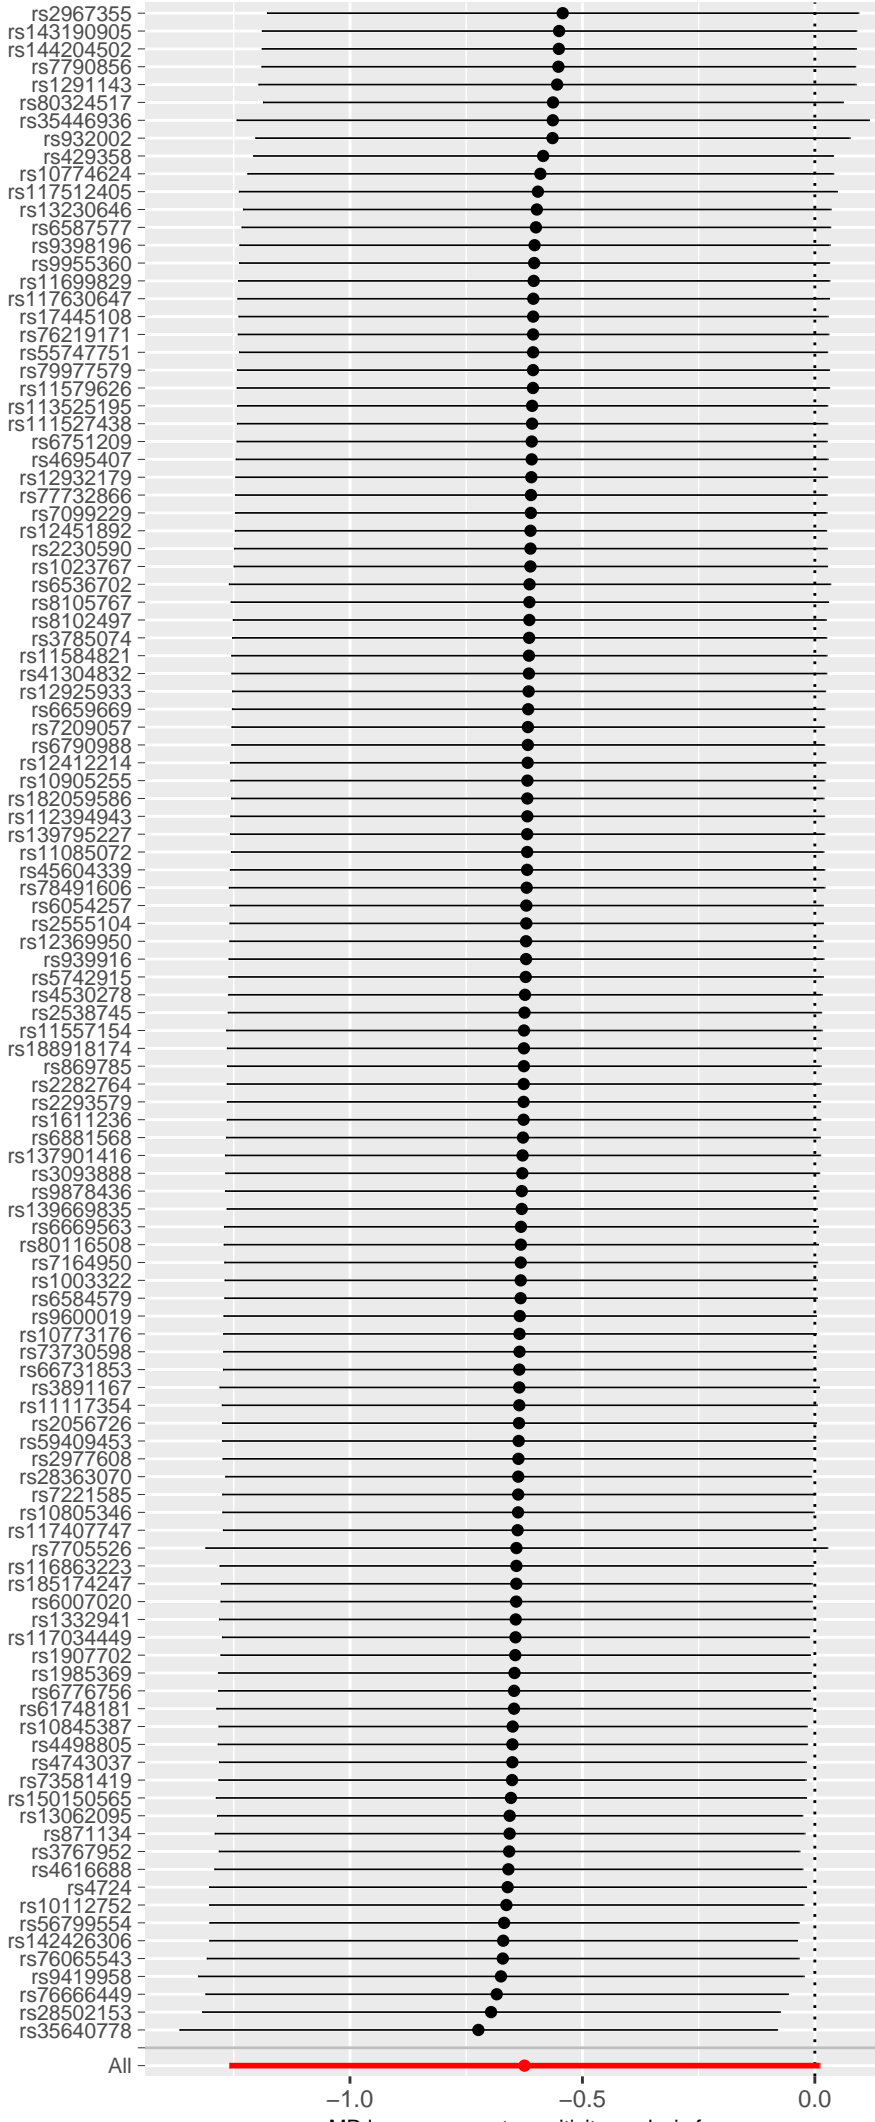

MR leave-one-out sensitivity analysis for 'telomere length || id:ieu-b-4879' on 'outcome'

Supplement: s1 [file s1]

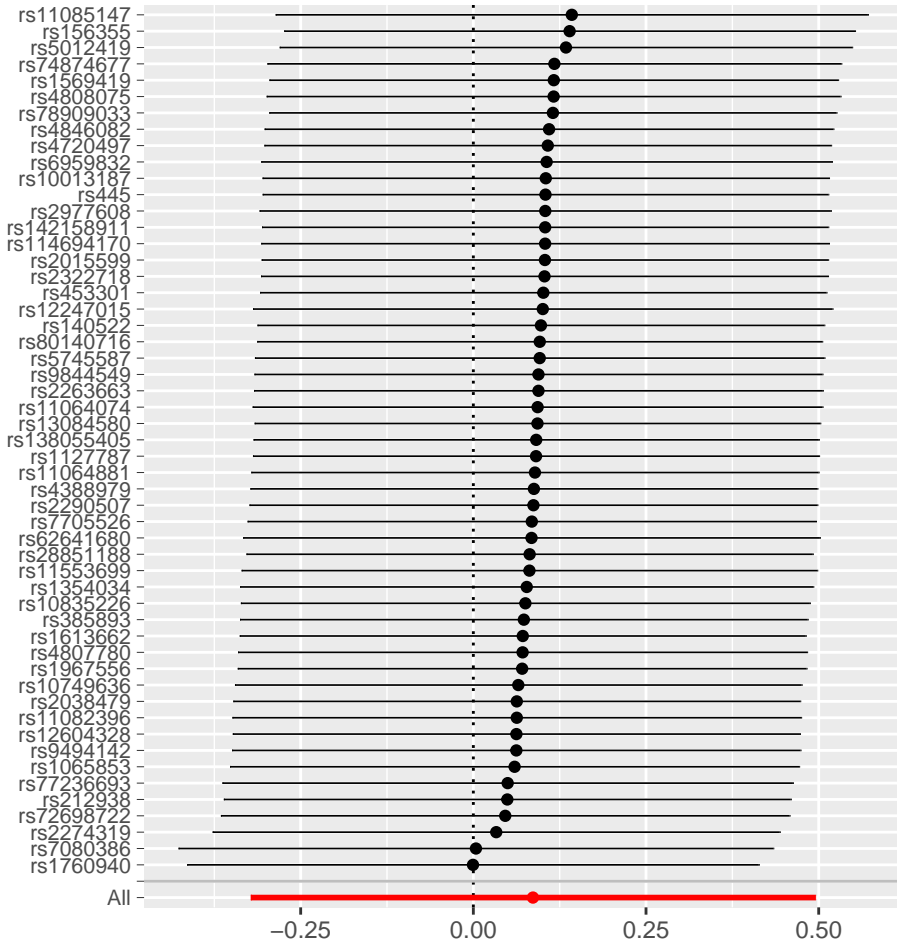

Supplement: s1 [file s1]

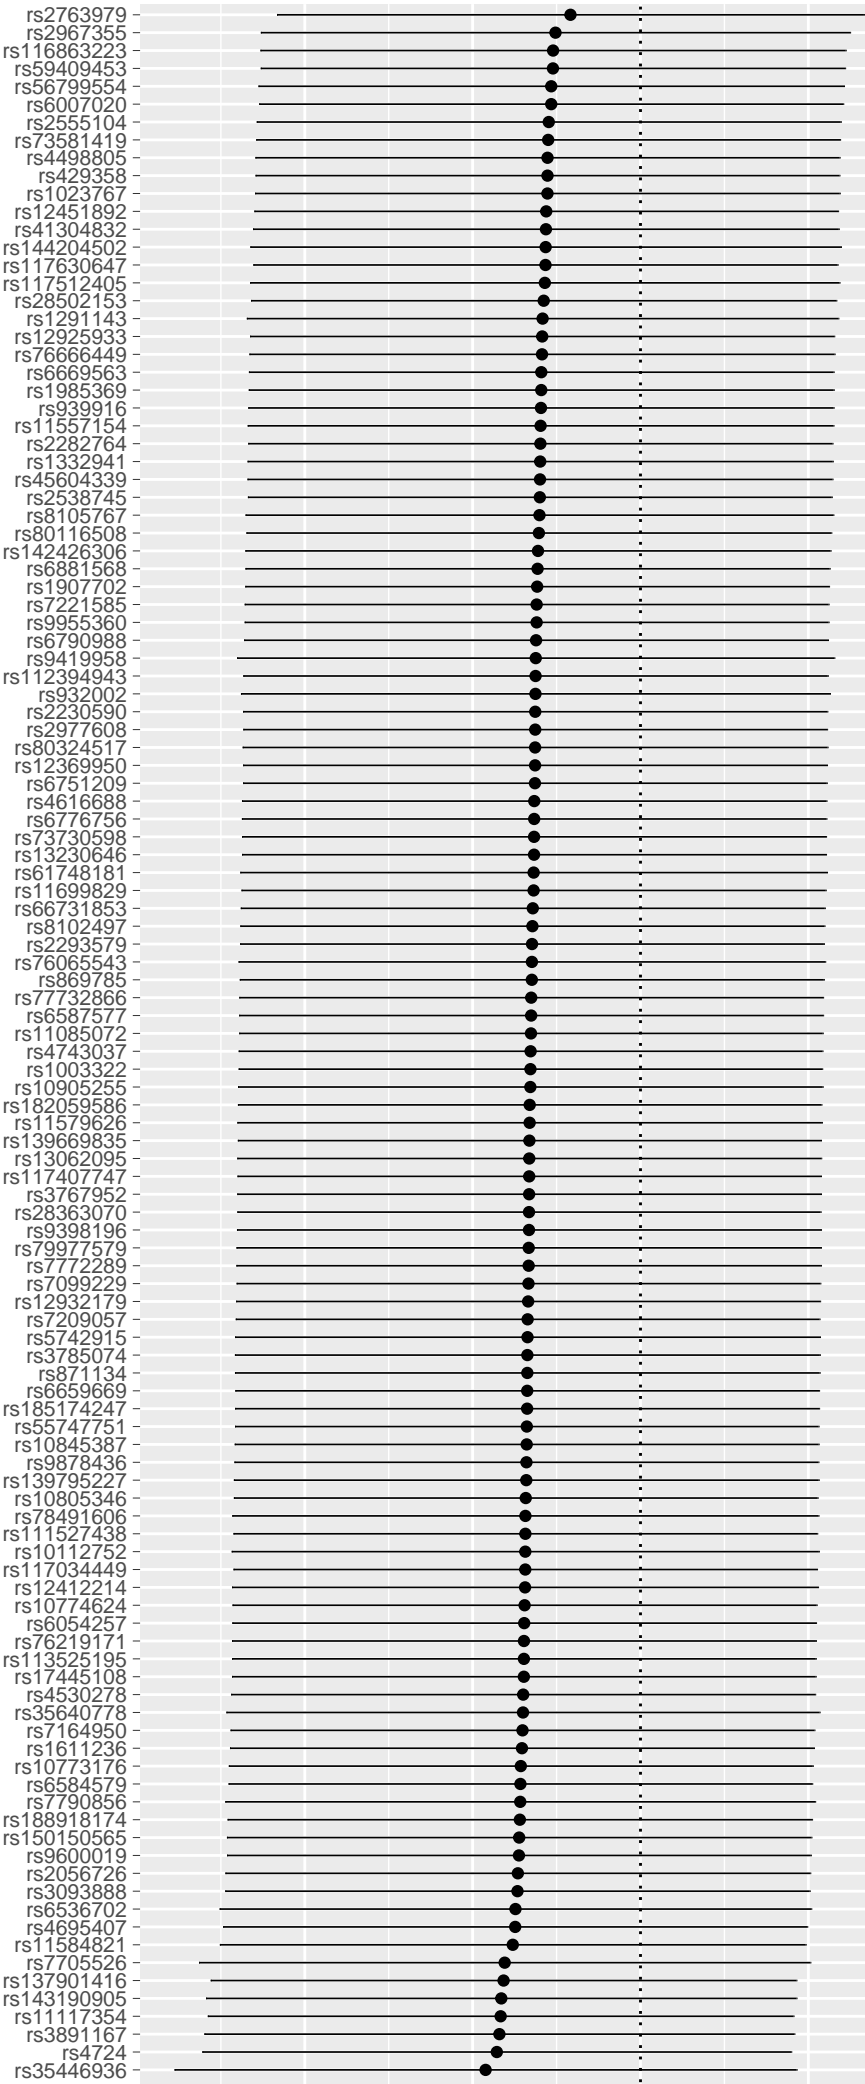

All

-1.0 -0.5 0.0 0.5

MR leave-one-out sensitivity analysis for 'telomere length || id:ieu-b-4879' on 'outcome'

Supplement: s1 [file s1]

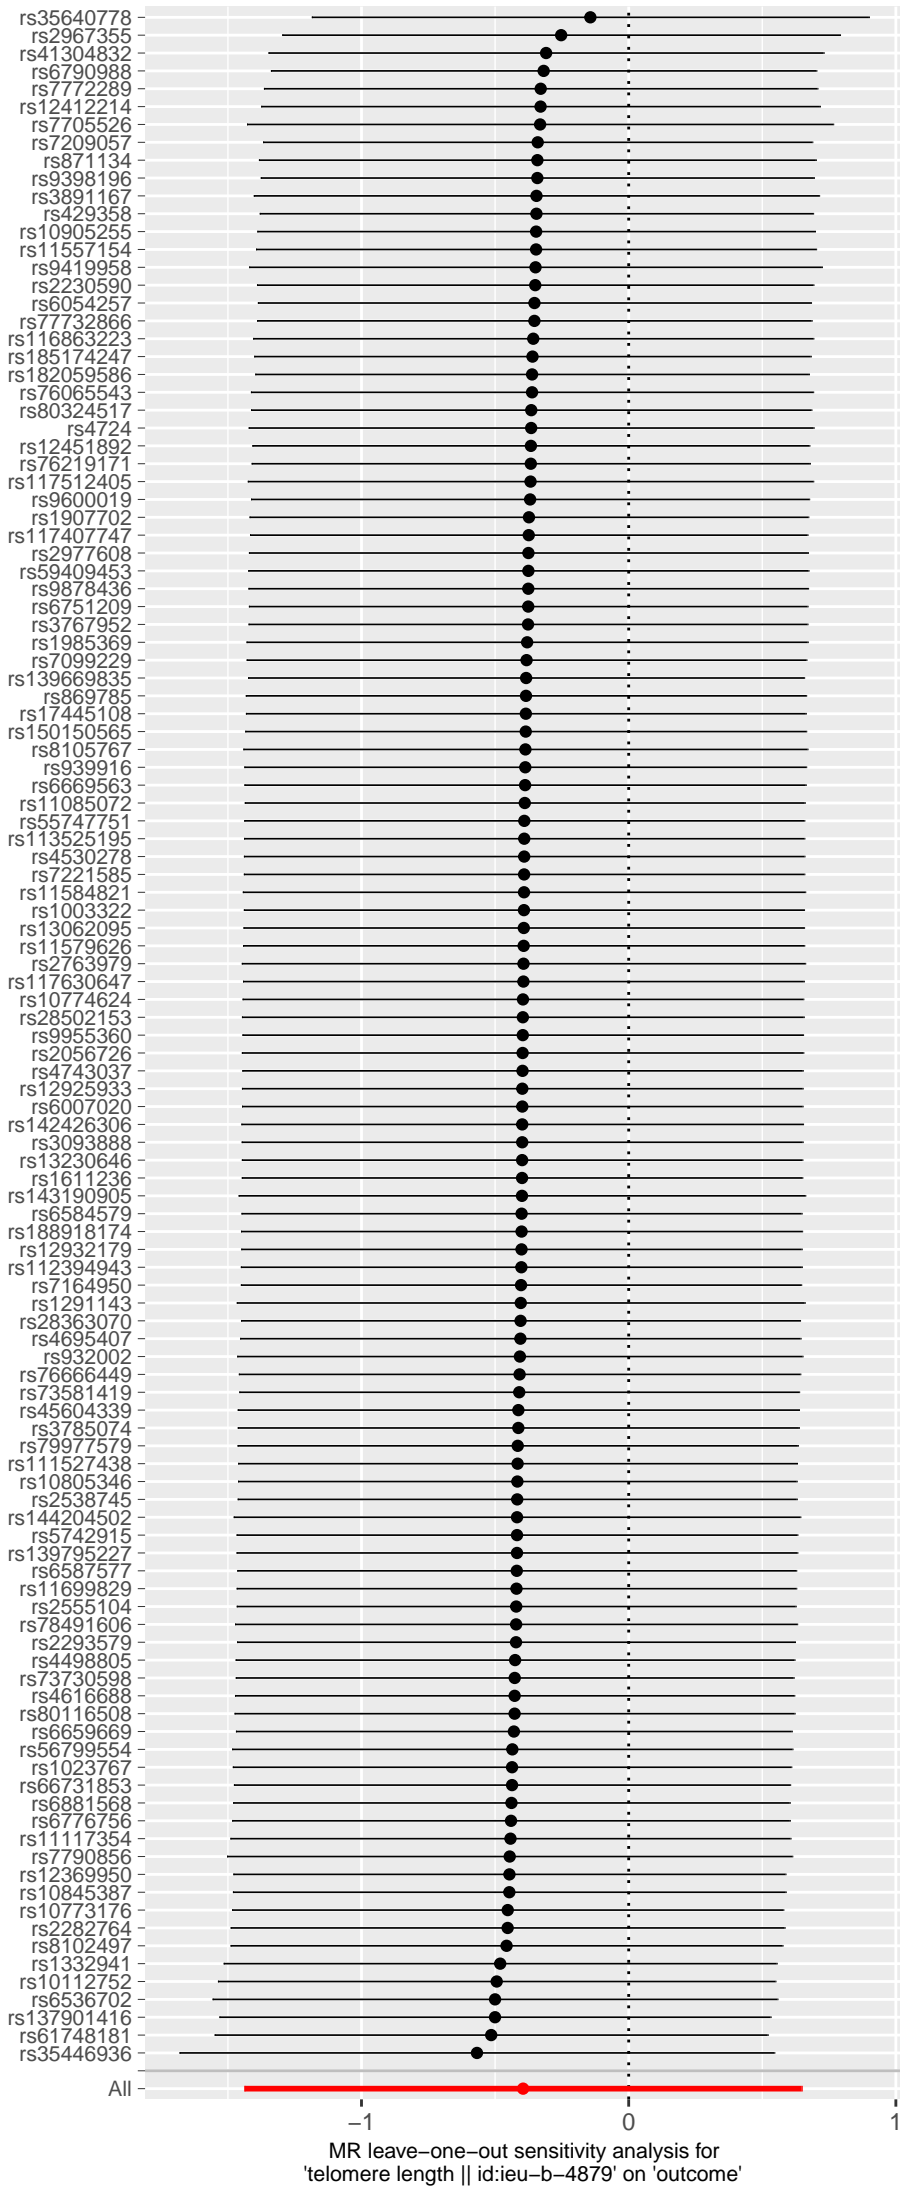

Supplement: s1 [file s1]
